# Supplementary material for: Keratin 19 maintains E-cadherin localization at the cell surface and stabilizes cell-cell adhesion of MCF7 cells
Source: bioRxiv or medRxiv preprint supplement (doi:10.1101/2020.05.28.119297), 2020-05-28
Supplement: Supplementary file [file media-1.pdf]

## Keratin 19 maintains E-cadherin localization at the cell surface and stabilizes cell-cell adhesion

Sarah Alsharif, Pooja Sharma, Karina Bursch, Rachel Milliken, Meagan Collins, Van Lam, Arwa Fallatah, Thuc Phan, Priya Dohlman, Georges Nehmetallah, Christopher B. Raub, and Byung Min Chung

### Supplementary Data

| Parameters         | Full name                               | parental   | KRT19 KO  | p-value |
|--------------------|-----------------------------------------|------------|-----------|---------|
| PhaseMean*         | Average phase height                    | 3950.0143  | 3638.2445 | 0.001   |
| PhaseMean SD       | Phase height standard deviation         | 1965.247   | 2032.7613 | 0.229   |
| ku                 | Phase height kurtosis                   | 2.2347166  | 2.2688439 | 0.649   |
| sk*                | Phase height skewness                   | -0.0868383 | 0.1012174 | 0       |
| Area (um2)*        | Segmented cell area                     | 460.37573  | 562.81516 | 0       |
| Perimeter (μm)*    | Segmented cell perimeter                | 95.032022  | 128.03663 | 0       |
| Eccentricity*      | Segmented cell fit ellipse eccentricity | 0.7245655  | 0.8664618 | 0       |
| Form factor*       | Segmented form factor                   | 0.65458    | 0.462963  | 0       |
| Contrast*          | 2nd order texture parameter             | 305.3581   | 329.5333  | 0.03    |
| Correlation        | 2nd order texture parameter             | 0.943321   | 0.9389649 | 0.07    |
| Energy             | 2nd order texture parameter             | 0.0001539  | 0.0001515 | 0.723   |
| Homogeneity        | 2nd order texture parameter             | 0.1841623  | 0.1816254 | 0.364   |
| NuPhaseMx          | Maximum nucleus phase height            | 9107.7722  | 9529.5549 | 0.103   |
| NuPhaseAve         | Average nucleus phase height            | 5727.4355  | 5454.9353 | 0.062   |
| NuclearArea (um2)* | Segmented nucleus area                  | 185.03516  | 225.39083 | 0       |
| NuclearKu*         | Phase height kurtosis                   | 0.614367   | 0.6625169 | 0.001   |
| NuclearSk*         | Phase height skewness                   | 1.6379479  | 1.8013399 | 0.05    |

**Table S1. Cell parameters generated from DHM segmentation.** Circularity is determined by eccentricity and form factor. A perfect circle has eccentricity equal to 0 and form factor equal to 1. Means from three experimental repeats are shown. Differences are not statistically significant unless denoted by \* $p < 0.05$ ; \*\* $p < 0.001$

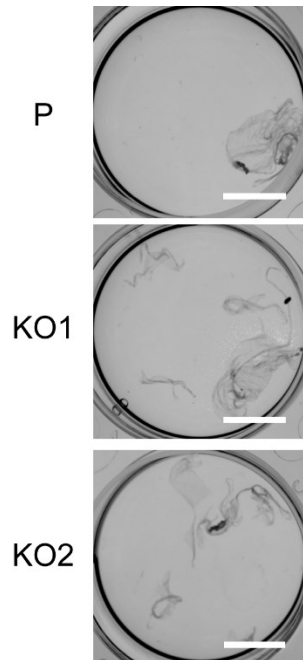

**Figure S1. *KRT19* KO cells show weakened cell-cell adhesion.** Phase contrast images of dispase treated cell fragments used for Fig 2E. Bar, 10  $\mu$ m.

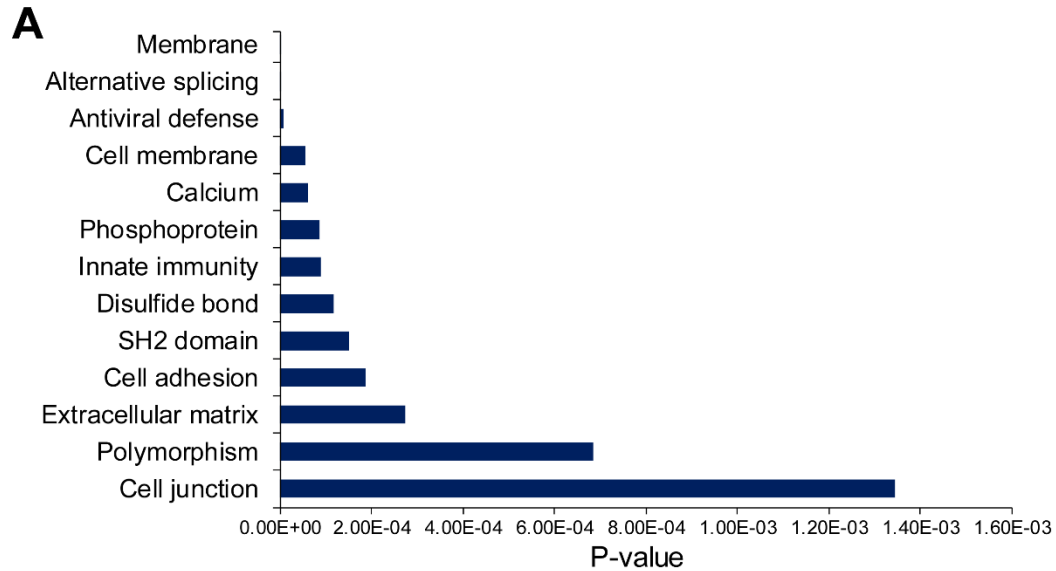

**B**

| Gene symbol | Gene name                                                          | RPKM P  | RPKM KO  | Log2 (fold change) |
|-------------|--------------------------------------------------------------------|---------|----------|--------------------|
| ENG         | Endoglin                                                           | 10.5734 | 4.31752  | -1.292165          |
| ICAM1       | Intercellular Adhesion Molecule 1                                  | 1.60904 | 0.810933 | -0.988546          |
| RND3        | Rho Family GTPase 3                                                | 4.29229 | 2.21303  | -0.955725          |
| PCDH17      | Protocadherin 17                                                   | 1.80447 | 0.945641 | -0.932211          |
| WISP2       | Cellular Communication Network Factor 5                            | 16.1533 | 9.63394  | -0.745631          |
| JUP         | Plakoglobin                                                        | 288.177 | 177.411  | -0.699860          |
| ITGAV       | Integrin Subunit Alpha 5                                           | 9.5714  | 12.4971  | 0.384791           |
| PALLD       | Palladin, cytoskeletal associated protein                          | 15.3946 | 20.5519  | 0.416847           |
| DSP         | Desmoplakin                                                        | 54.1604 | 74.638   | 0.462672           |
| CLDN1       | Claudin1                                                           | 4.56072 | 6.68239  | 0.551103           |
| CADM1       | Cell Adhesion Molecule 1                                           | 3.58198 | 5.59959  | 0.644564           |
| CDH3        | P-cadherin                                                         | 26.0338 | 42.2293  | 0.697858           |
| ITGA6       | Integrin Subunit Alpha 6                                           | 1.56782 | 2.54423  | 0.698469           |
| FSCN1       | Fascin Actin-bundling Protein 1                                    | 17.3017 | 28.4115  | 0.715561           |
| PODXL       | Podocalyxin Like                                                   | 3.07798 | 5.14708  | 0.741770           |
| COL18A1     | Collagen Type XVIII Alpha 1 Chain                                  | 14.3142 | 26.2243  | 0.873457           |
| CLDN9       | Claudin9                                                           | 2.43677 | 4.46757  | 0.874520           |
| COL6A1      | Collagen Type VI Alpha 1 Chain                                     | 4.91318 | 10.14    | 1.045329           |
| ADAM9       | ADAM Metallopeptidase Domain 9                                     | 9.97818 | 20.7437  | 1.055825           |
| DNMBP       | Dynamin Binding Protein                                            | 1.06723 | 2.31561  | 1.117521           |
| ATP1B1      | ATPase Na <sup>+</sup> /K <sup>+</sup> Transporting Subunit Beta 1 | 7.76789 | 17.2509  | 1.151077           |
| MCAM        | Melanoma Cell Adhesion Molecule                                    | 1.89175 | 4.48657  | 1.245891           |
| CXCL12      | C-X-C Motif Chemokine Ligand 12                                    | 39.1316 | 97.7939  | 1.321410           |
| GPNMB       | Glycoprotein Nmb                                                   | 1.16355 | 3.15029  | 1.436951           |
| COL5A1      | Collagen Type V Alpha 1 Chain                                      | 2.04502 | 7.10348  | 1.796411           |
| MSLN        | Pre-Pro-Megakaryocyte-Potentiating Factor                          | 0.9121  | 4.1815   | 2.196752           |
| TGFB2       | Transforming Growth Factor Beta 2                                  | 0.43267 | 3.88347  | 3.166021           |

**Figure S2. Increased expression of cell adhesion molecules in *KRT19* KO cells. (A)** A list of top keywords in functional categories associated with genes upregulated in *KRT19* KO from the RNA sequencing data [32] using the DAVID functional annotation software. **(B)** List of major cell adhesion molecules that are differentially regulated in *KRT19* KO cells.

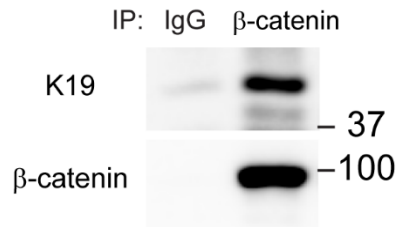

**Figure S3. K19 interacts with  $\beta$ -catenin in MCF7 cells.** IP with anti- $\beta$ -catenin antibody or IgG control was performed. IP samples were subjected to SDS-PAGE and immunoblotting was performed with antibodies against K19 and  $\beta$ -catenin.

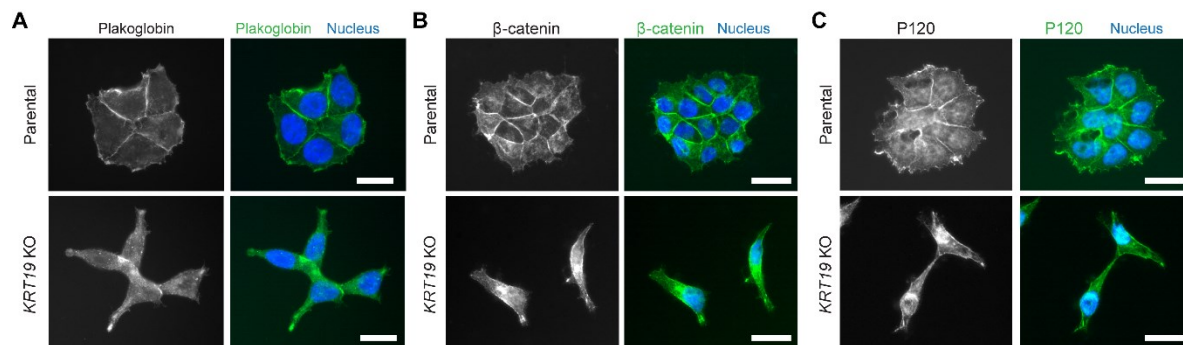

**Figure S4. Decreased membrane-bound plakoglobin,  $\beta$ -catenin, and P120-catenin in *KRT19* KO Cells.** Immunostaining of (A) plakoglobin, (B)  $\beta$ -catenin, and (C) P120-catenin in parental and *KRT19* KO (KO2) cells. Nuclei are shown in blue. Bar, 20  $\mu$ m.

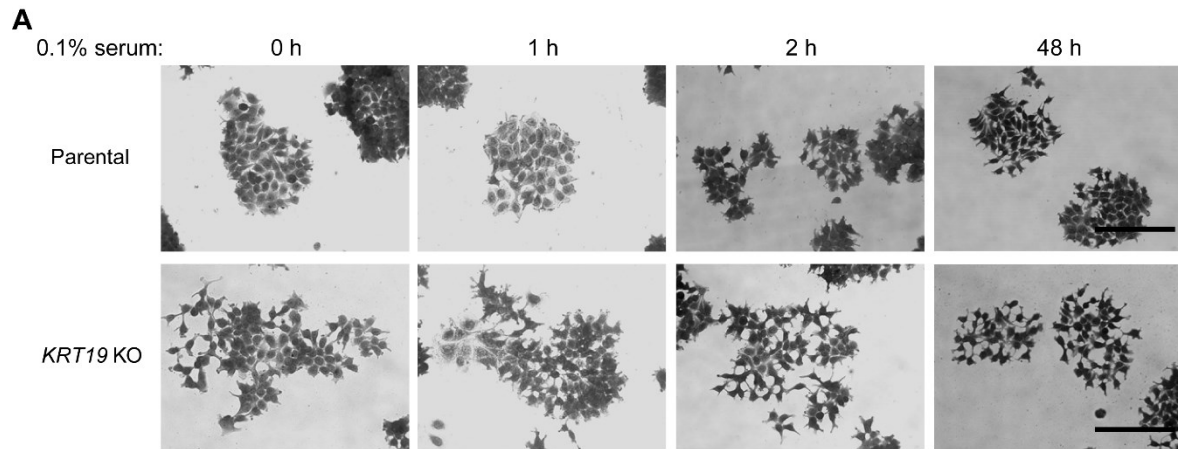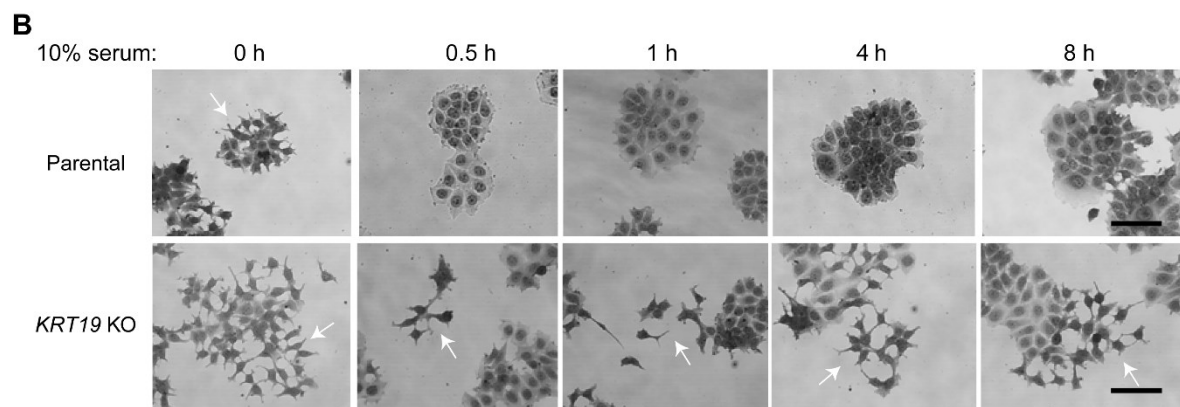

**Figure S5. Decreased responsiveness of *KRT19* KO cells for cell-cell adhesion upon serum stimulation.** (A) Phase contrast images of parental and *KRT19* KO (KO2) cells following serum starvation for indicated time points. Bar, 200  $\mu$ m. Whereas parental cells show detachments between cells only after 48 h from serum starvation, shape of *KRT19* KO cells remain detached throughout serum starvation. Bar, 200  $\mu$ m. (B) Phase contrast images of parental and *KRT19* KO (KO2) cells serum-starved for 24 h, then stimulated with 10% serum for indicated time points. Parental cells rapidly re-attach from 0.5 h time point but *KRT19* KO cells remain detached throughout serum starvation. Arrows indicate low cell-cell adhesions Bar, 100  $\mu$ m.
